# Supplementary material for: A fluorogenic probe for granzyme B enables in-biopsy evaluation and screening of response to anticancer immunotherapies
Source: PubMed Central journal article supplement (PMC9061857; doi:10.1038/s41467-022-29691-w), 2022-05-02
Supplement: 41467_2022_29691_MOESM3_ESM.pdf [file 41467_2022_29691_MOESM3_ESM.pdf]

## **Description of Additional Supplementary Information**

### **Supporting Information Inventory**

Supplementary Figures 1-19

Supplementary Tables 1-5

Supplementary Movie Legends 1-2

Supplementary Notes 1-2

Supplementary Methods

Supplementary References 1-5
